# Supplementary material for: Visible-light-driven BiOBr nanosheets for highly facet-dependent photocatalytic inactivation of Escherichia coli
Source: Royal Society of Chemistry journal article supplement (doi:10.1039/c5ta02757h), 2015-01-01
Supplement: c5ta02757h1.pdf [file c5ta02757h1.pdf]

## Supporting Information

### Visible-light-driven BiOBr nanosheets for highly facet-dependent photocatalytic inactivation of *Escherichia coli*

Dan Wu,<sup>a</sup> Bo Wang,<sup>a</sup> Wei Wang,<sup>\*ab</sup> Taicheng An,<sup>\*c</sup> Guiying Li,<sup>c</sup> Tsz Wai Ng,<sup>a</sup> Ho Yin Yip,<sup>a</sup> Chunmei Xiong,<sup>b</sup> Hung Kay Lee<sup>d</sup> and Po Keung Wong<sup>\*ac</sup>

<sup>a</sup> School of Life Sciences, The Chinese University of Hong Kong, Shatin, NT, Hong Kong SAR, China

<sup>b</sup> College of Materials Science and Engineering, Huazhong University of Science and Technology, Wuhan 430074, China

<sup>c</sup> State Key Laboratory of Organic Geochemistry and Guangdong Key Laboratory of Environmental Resources Utilization and Protection, Guangzhou Institute of Geochemistry, Chinese Academy of Sciences, Guangzhou 510640, China

<sup>d</sup> Department of Chemistry, The Chinese University of Hong Kong, Shatin, NT, Hong Kong SAR, China

\*Corresponding authors:

Wei Wang: Tel: +86 27-8754-1540, Fax: Tel: +82 27-8754-1540, E-mail: [weiwang@hust.edu.cn](mailto:weiwang@hust.edu.cn);

Taicheng An: Tel: +86-20-8529-1501, Fax: +86-20-8529-0706, E-mail: [antc99@gig.ac.cn](mailto:antc99@gig.ac.cn);

Po Keung Wong: Tel: +852 3943-6383, Fax: +852-2603-5767, E-mail: [pkwong@cuhk.edu.hk](mailto:pkwong@cuhk.edu.hk)

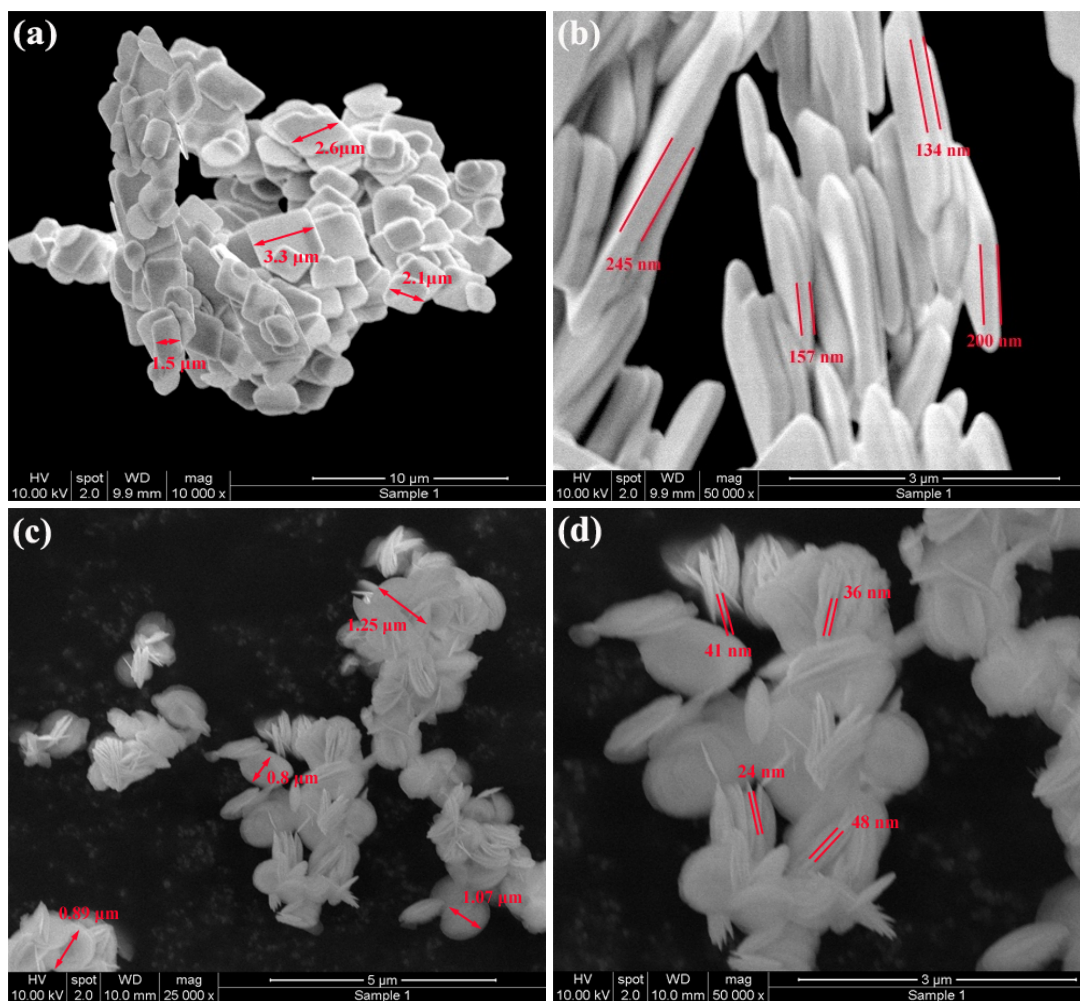

**Fig. S1** SEM images of (a) and (b) for B001, and (c) and (d) for B010 nanosheets.

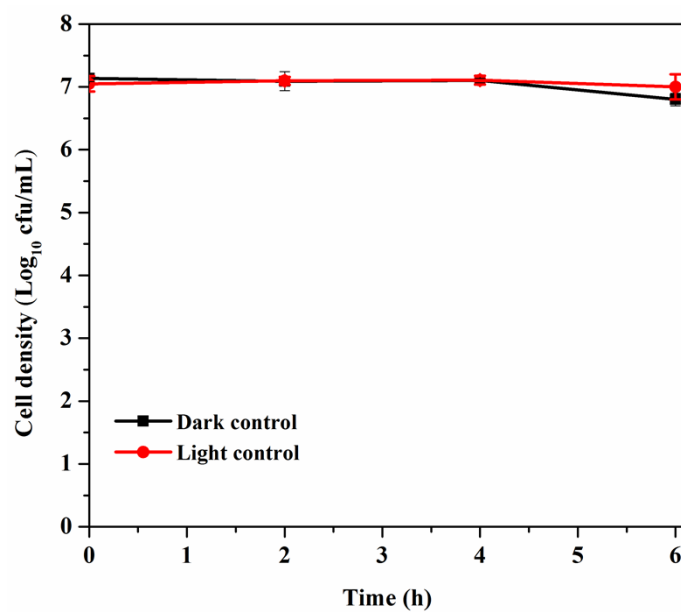

**Fig. S2** Dark and light controls for the photocatalytic inactivation by B010 nanosheets towards *E. coli* K-12 ( $1 \times 10^7$  CFU mL<sup>-1</sup>) in the presence of 0.05 mM Cr(VI).

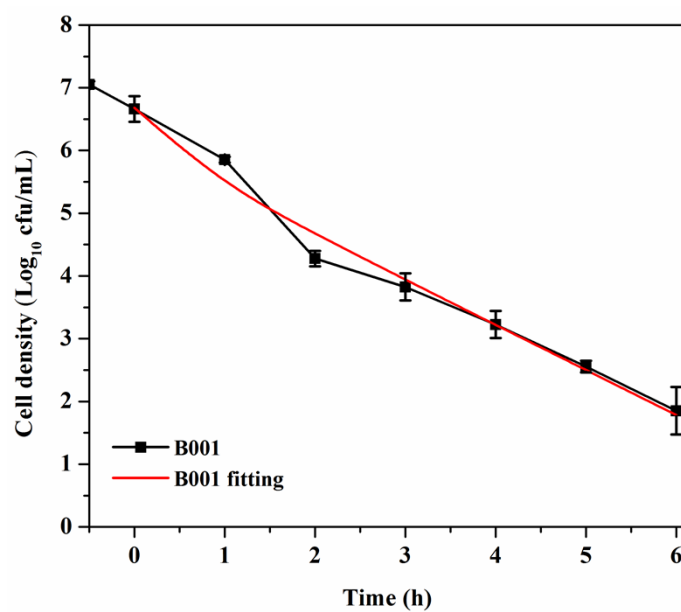

**Fig. S3** Photocatalytic inactivation efficiency of *E. coli* K-12 ( $1 \times 10^7$  CFU mL<sup>-1</sup>) in the presence of B001 nanosheets purging with Ar purging under VL irradiation.

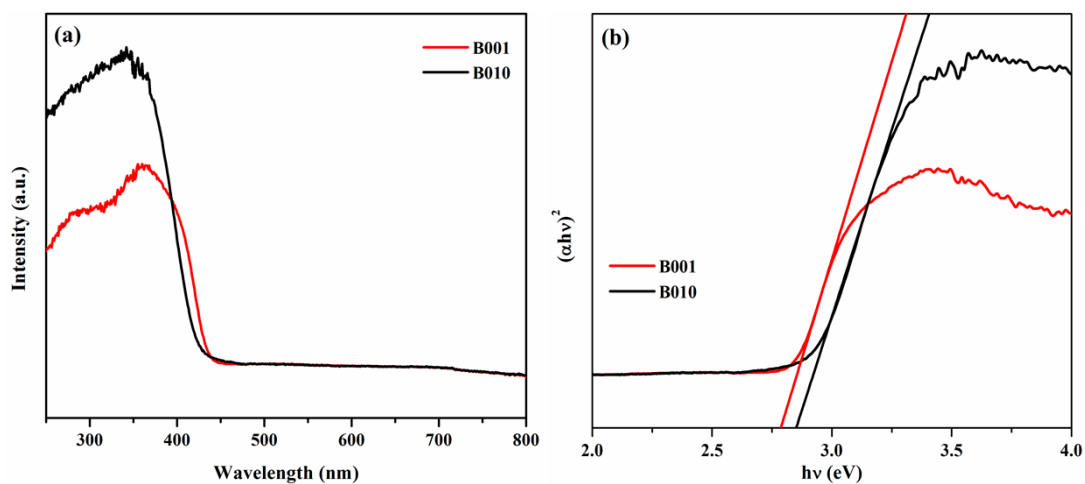

**Fig. S4** (a) UV-vis diffuse reflectance spectra and (b) the plots of transformed Kubelka-Munk function *versus* the energy light of the B001 and B010 nanosheets.

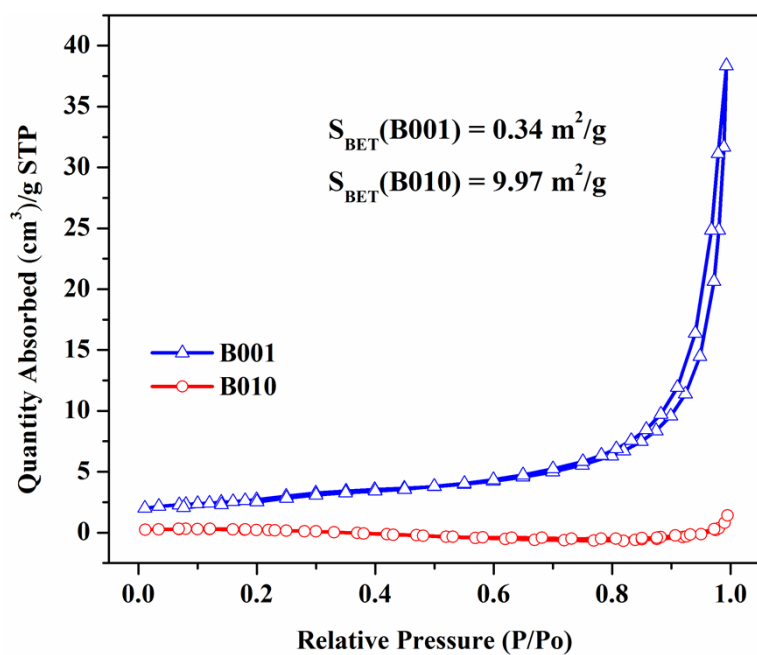

**Fig. S5** Nitrogen adsorption-desorption isotherm of the B001 and B010 nanosheets.

**Table S1** The fitting parameters of the equivalent circuit.

|        | B010     | B001      |
|--------|----------|-----------|
| $R_s$  | 28.58    | 32.37     |
| $R_1$  | 12590    | 9157      |
| $R_2$  | 4.955    | 5.823     |
| $R_3$  | 1.109E6  | 1.305E7   |
| $C_3$  | 2.099E-5 | 1.9841E-5 |
| CPE1-P | 0.9181   | 0.9178    |
| CPE1-Y | 4.481E-5 | 4.457E-5  |
| CPE2-P | 0.9044   | 0.8773    |
| CPE2-Y | 4.129E-5 | 4.91E-5   |

$R_s$ : the resistance of the solution;

$R_1$ : the resistance of the work electrode (B001 or B010)

$R_2$ : the resistance of the counter electrode

$R_3$ : the resistance of the reaction;

$C_3$ : the capacitance of the counter electrode;

CPE-P/CPE-Y: the deviation of constant phase angle (the value is close to 1 indicating a trend to fabricate a double-layer electric).
